# Supplementary material for: Phase switching and shape-memory effect in a molecular material: revisiting the Werner complex [Ni(4-MePy)4(NCS)2]
Source: Royal Society of Chemistry journal article supplement (doi:10.1039/d4qi00636d), 2024-01-01
Supplement: d4qi00636d1.pdf [file d4qi00636d1.pdf]

## Supporting Information

### **Phase switching and shape-memory effect in a molecular material: revisiting the Werner complex [Ni(4-MePy)<sub>4</sub>(NCS)<sub>2</sub>]**

*Shi-Qiang Wang,<sup>\*a</sup> Shaza Darwish,<sup>b</sup> Catiúcia R. M. O. Matos,<sup>b</sup> Zicong Marvin Wong,<sup>c</sup> Anjiah Nalaparaju,<sup>c</sup>  
Yifei Luo,<sup>a</sup> Jun Zhu,<sup>a</sup> Xiaofei Zhang,<sup>a</sup> Zhengtao Xu,<sup>\*a</sup> and Michael J. Zaworotko<sup>\*b</sup>*

*<sup>a</sup>Institute of Materials Research and Engineering (IMRE), Agency for Science, Technology and Research  
(A\*STAR), 2 Fusionopolis Way 138634, Singapore.*

*<sup>b</sup>Bernal Institute, Department of Chemical Sciences, University of Limerick, Limerick V94 T9PX, Ireland.*

*<sup>c</sup>Institute of High Performance Computing (IHPC), Agency for Science, Technology and Research (A\*STAR),  
1 Fusionopolis Way 138632, Singapore.*

*\*E-mail: [wangsq@imre.a-star.edu.sg](mailto:wangsq@imre.a-star.edu.sg); [zhengtao@imre.a-star.edu.sg](mailto:zhengtao@imre.a-star.edu.sg); [xtal@ul.ie](mailto:xtal@ul.ie)*

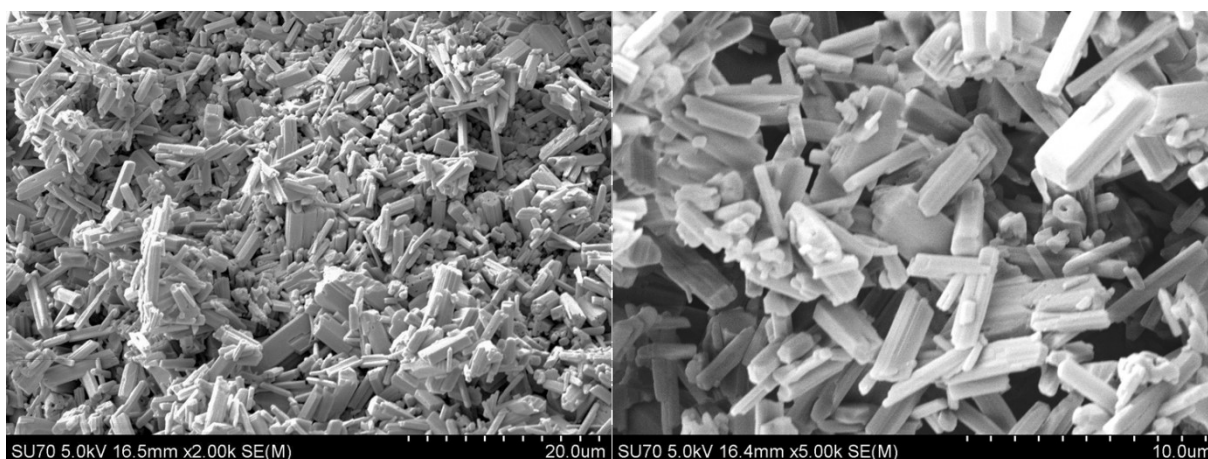

Figure S1. SEM images of the as-made powder sample of  $[\text{Ni}(4\text{-MePy})_4(\text{NCS})_2]\text{-}\alpha$ .

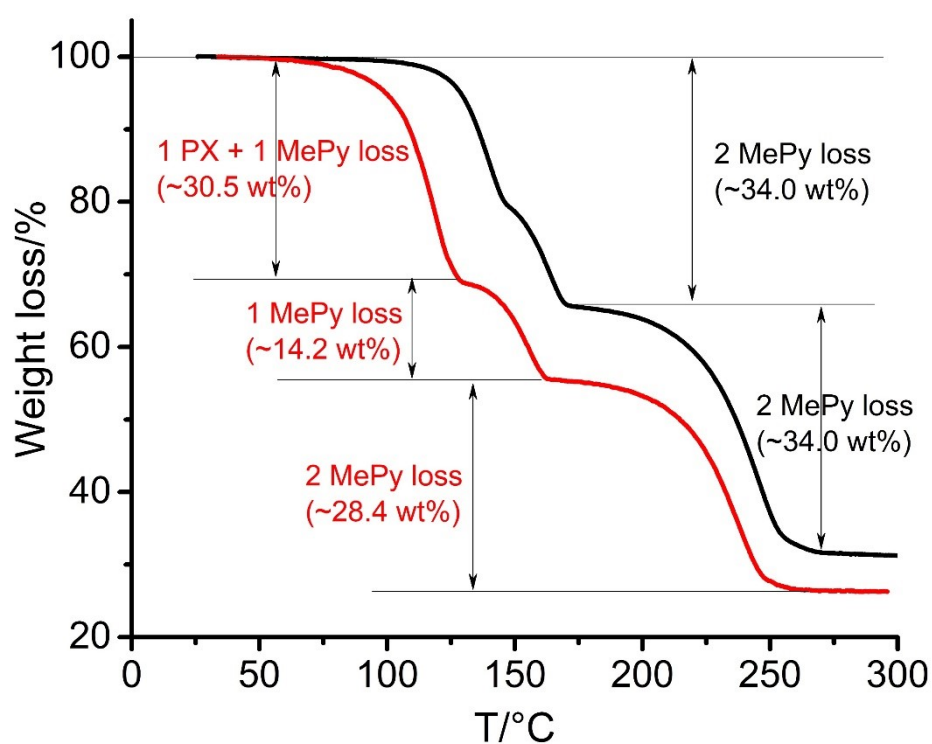

Figure S2. TGA curves of the closed  $\alpha$  (black line) and PX-loaded  $\beta$  (red line) phases of  $[\text{Ni}(4\text{-MePy})_4(\text{NCS})_2]$ .

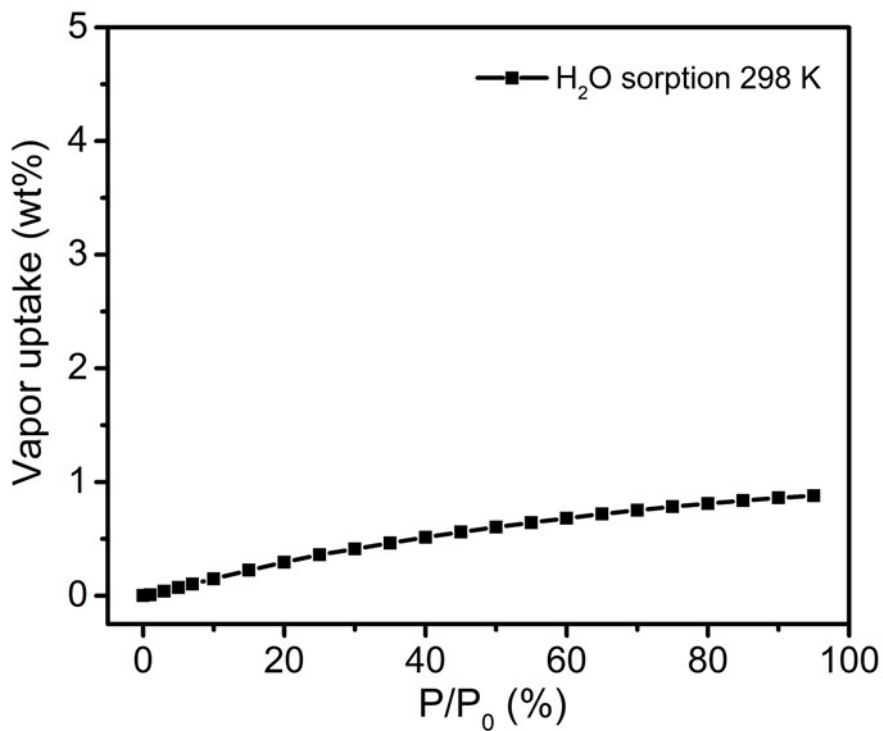

Figure S3. Water vapor sorption isotherm (298 K) of the as-made  $[\text{Ni}(\text{4-MePy})_4(\text{NCS})_2]\text{-}\alpha$ .

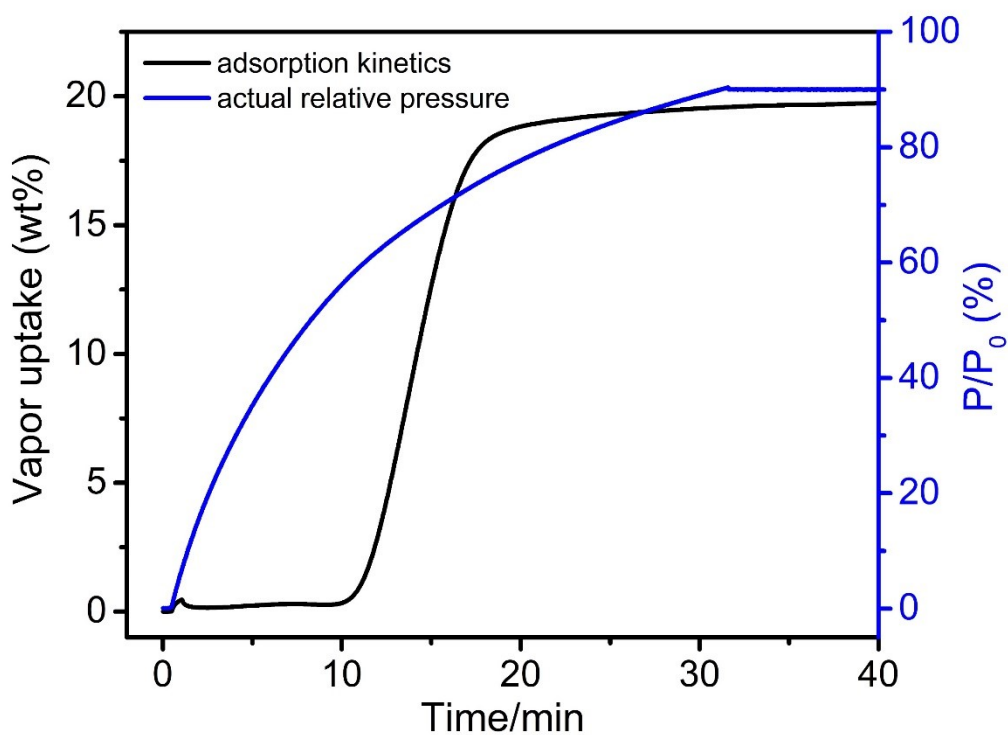

Figure S4. PX sorption kinetics test (298 K) of the single-crystal form of  $[\text{Ni}(\text{4-MePy})_4(\text{NCS})_2]\text{-}\alpha$ .

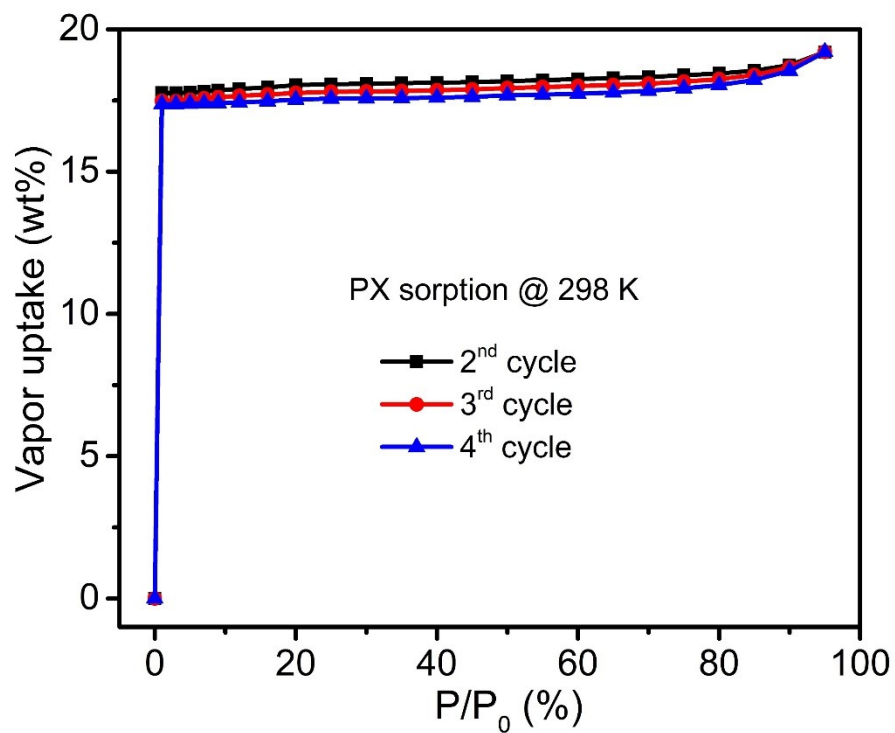

Figure S5. The recyclability test of the open-empty  $\beta'$  phase of  $[\text{Ni}(\text{4-MePy})_4(\text{NCS})_2]$ .

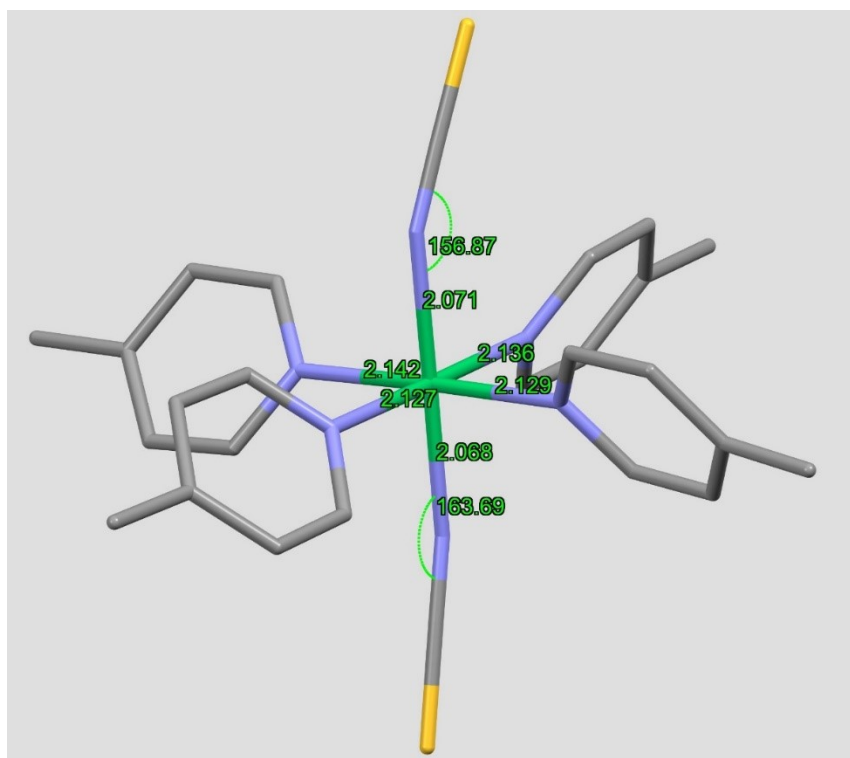

Figure S6. Crystal structural information of  $[\text{Ni}(\text{4-MePy})_4(\text{NCS})_2]\text{-}\alpha$  (refcode: ICMPNI03).

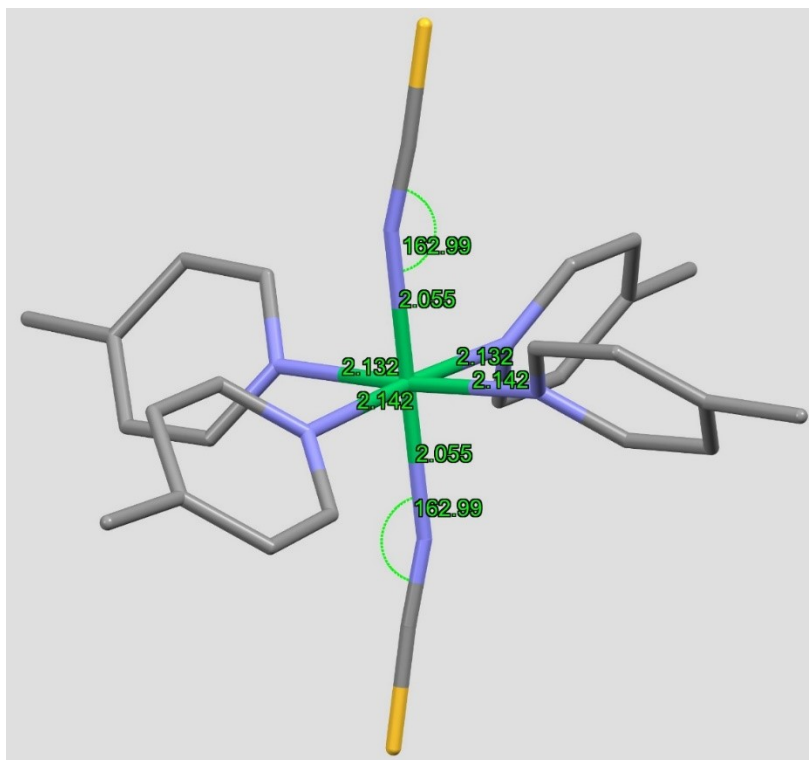

Figure S7. Crystal structural information of  $[\text{Ni}(\text{4-MePy})_4(\text{NCS})_2]\text{-PX}$  (refcode: BAPZAT).

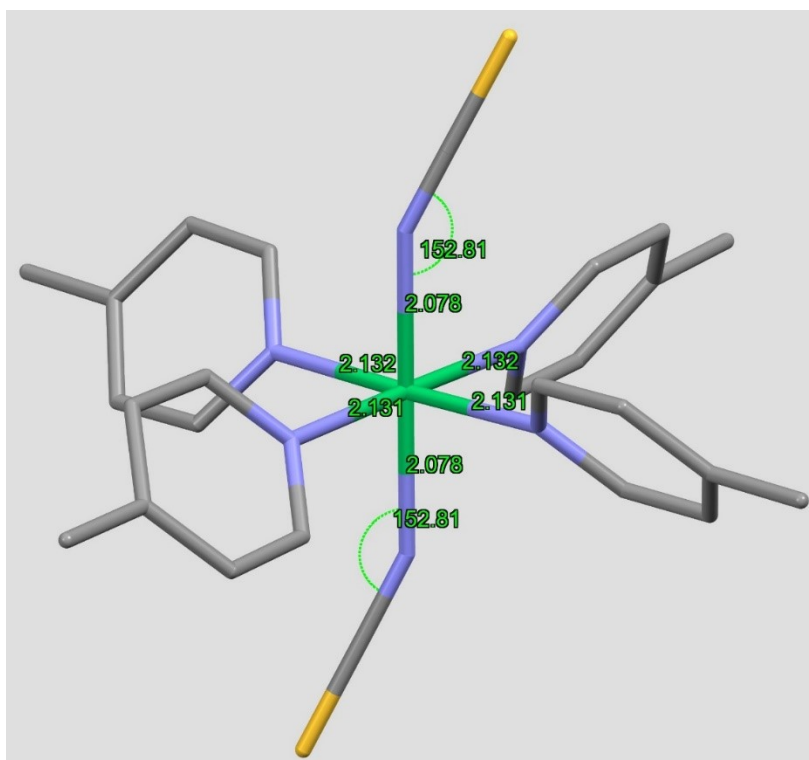

Figure S8. Crystal structural information of  $[\text{Ni}(\text{4-MePy})_4(\text{NCS})_2]\text{-}\beta'$  (refcode: ICMPNI04).

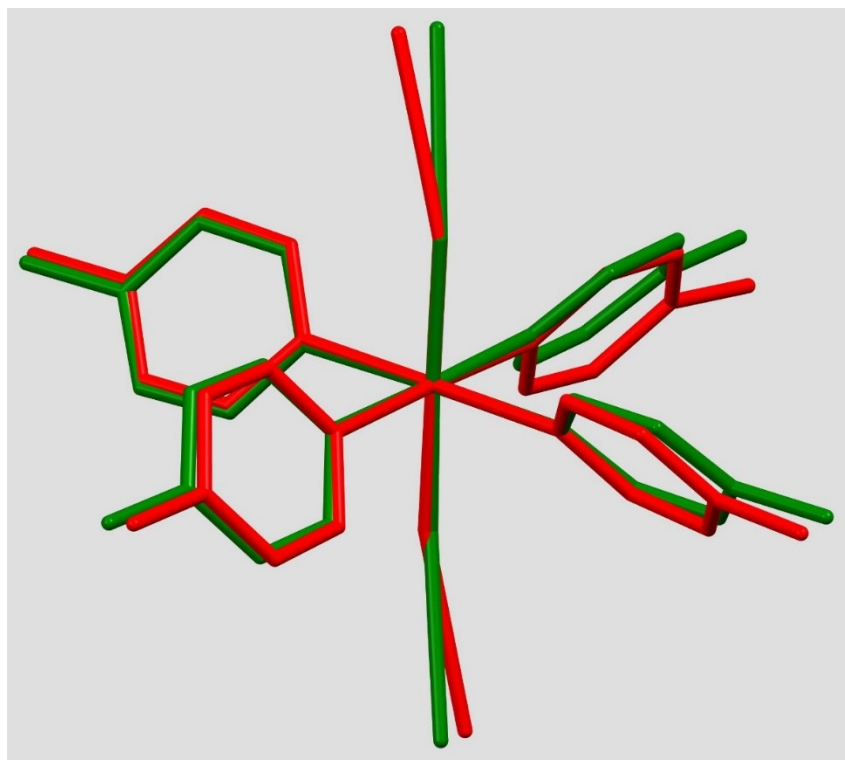

Figure S9. Structural overlay of the closed (red) and open-empty (green) phases of  $[\text{Ni}(4\text{-MePy})_4(\text{NCS})_2]$ .

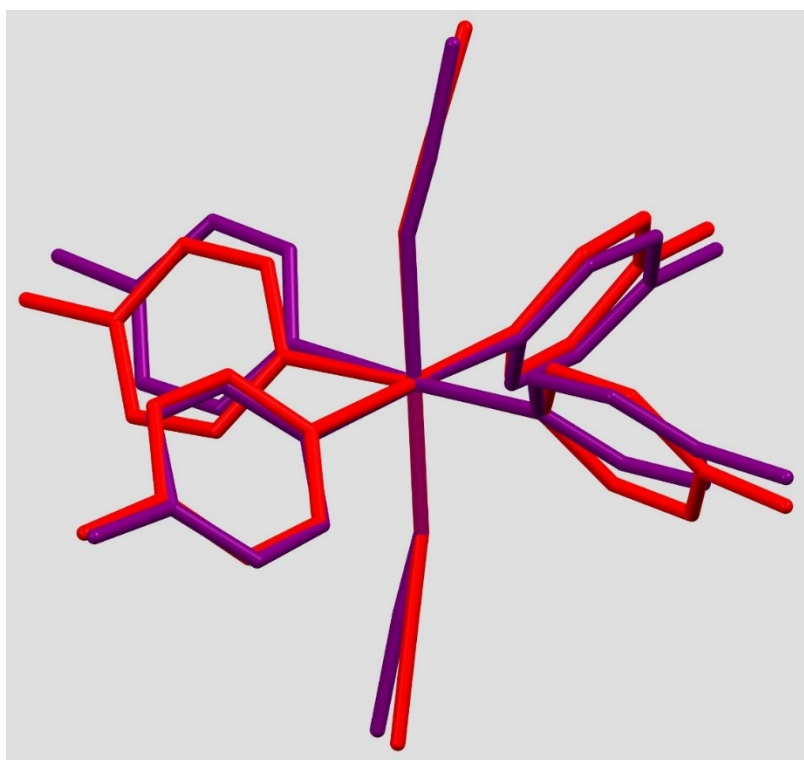

Figure S10. Structural overlay of the closed (red) and PX-loaded (purple) phases of  $[\text{Ni}(4\text{-MePy})_4(\text{NCS})_2]$ .

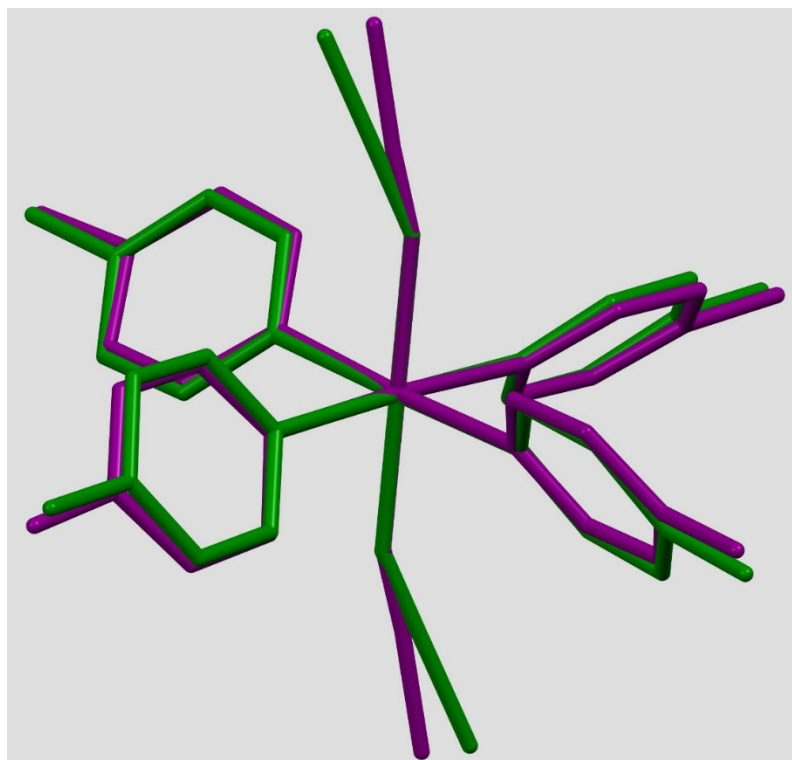

Figure S11. Structural overlay of the open-empty (green) and PX-loaded (purple) phases of [Ni(4-MePy)<sub>4</sub>(NCS)<sub>2</sub>].

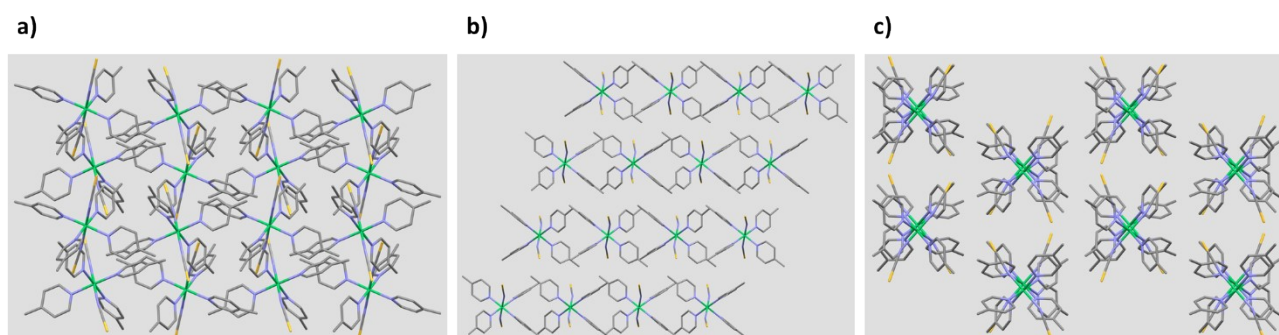

Figure S12. Packing mode of [Ni(4-MePy)<sub>4</sub>(NCS)<sub>2</sub>]-**a** along a) *a*, b) *b*, and c) *c* axis (refcode: ICMPNI03).

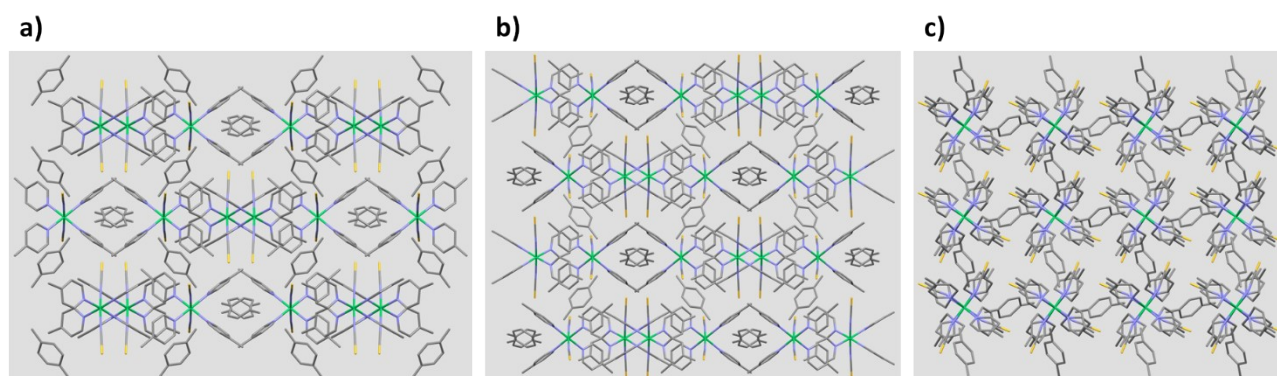

Figure S13. Packing mode of [Ni(4-MePy)<sub>4</sub>(NCS)<sub>2</sub>]-PX along a) *a*, b) *b*, and c) *c* axis (refcode: BAPZAT).

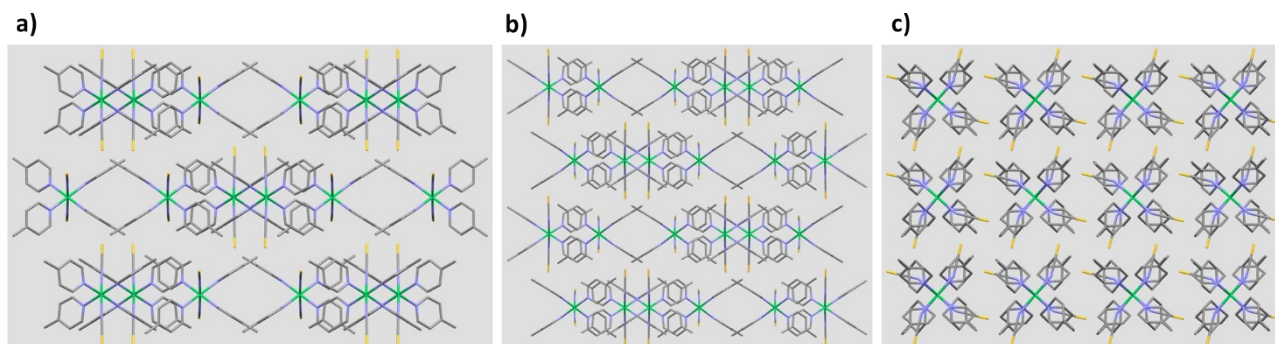

Figure S14. Packing mode of  $[\text{Ni}(\text{4-MePy})_4(\text{NCS})_2]\text{-}\beta'$  along a) *a*, b) *b*, and c) *c* axis (refcode: ICMPNI04).

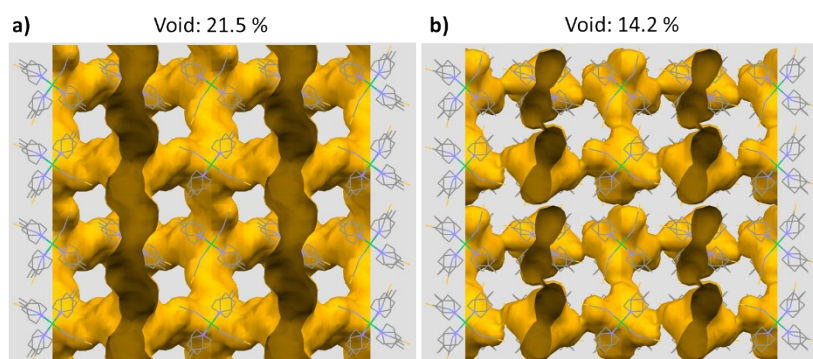

Figure S15. Crystal structural void analysis of a)  $[\text{Ni}(\text{4-MePy})_4(\text{NCS})_2]\text{-PX}$  (PX molecule is excluded) and b)  $[\text{Ni}(\text{4-MePy})_4(\text{NCS})_2]\text{-}\beta'$ . The probe radius is 1.2 Å.

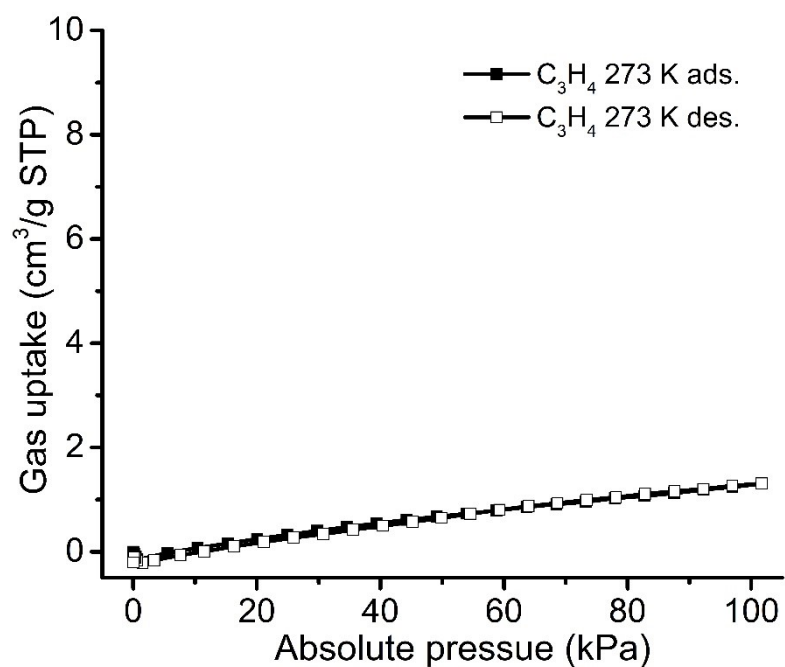

Figure S16. 273 K  $\text{C}_3\text{H}_4$  sorption isotherms for  $[\text{Ni}(\text{4-MePy})_4(\text{NCS})_2]\text{-}\alpha$ .



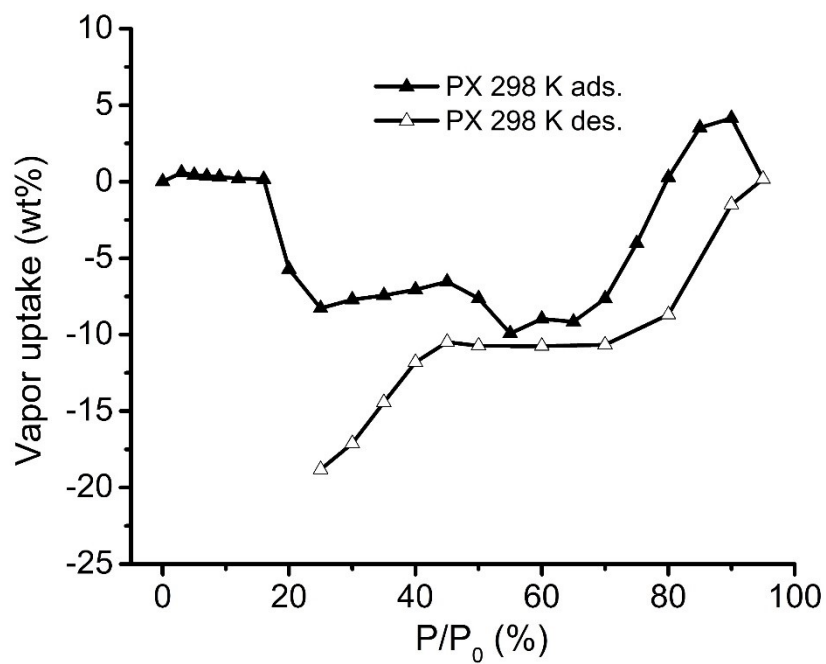

Figure S17. PX vapor sorption isotherms (298 K) of the regenerated  $[\text{Ni}(4\text{-MePy})_4(\text{NCS})_2]\text{-}\alpha$ .

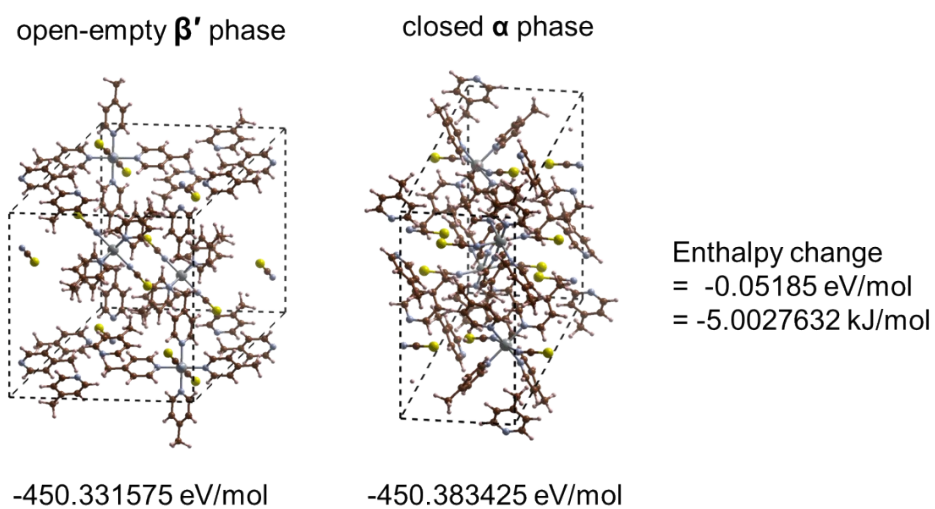

Fig. S18. Enthalpy change between the  $\alpha$  and  $\beta'$  phases calculated by the density functional theory.

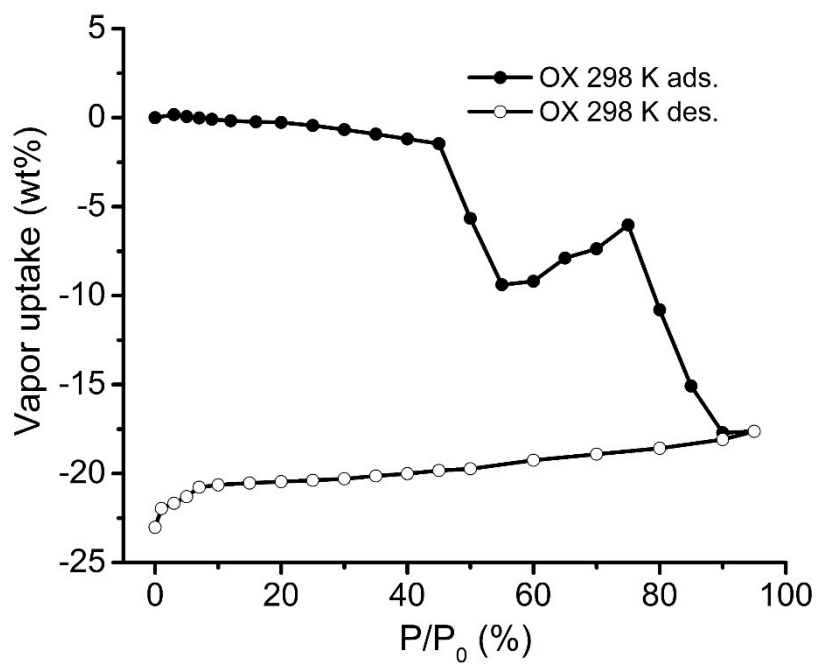

Figure S19. OX vapor sorption isotherms (298 K) of  $[\text{Ni}(4\text{-MePy})_4(\text{NCS})_2]\text{-}\alpha$ .

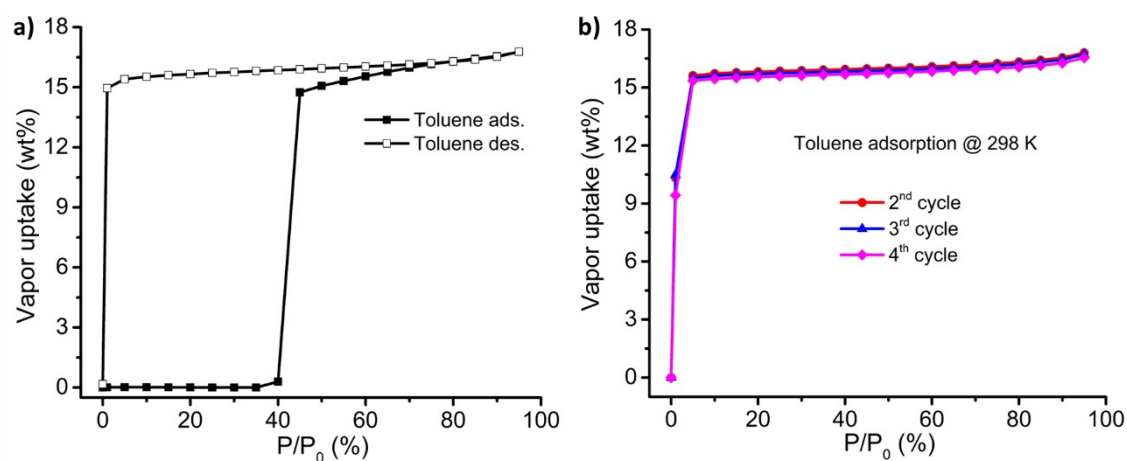

Figure S20. Toluene sorption (298 K) on  $[\text{Ni}(4\text{-MePy})_4(\text{NCS})_2]\text{-}\alpha$ : a) first cycle, and b) the subsequent 2-4 cycles.

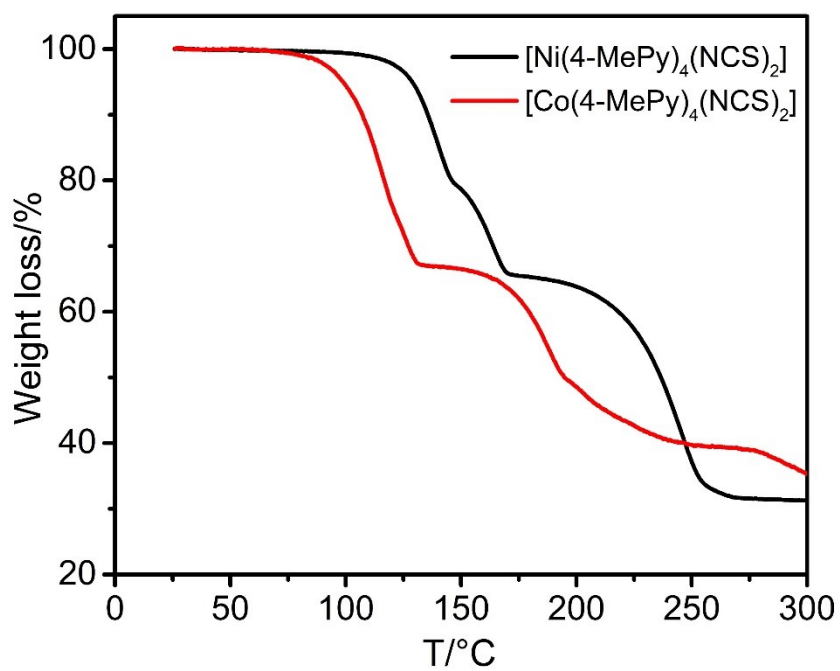

Figure S21. Comparison of the thermal stability between [Co(4-MePy)<sub>4</sub>(NCS)<sub>2</sub>] and [Ni(4-MePy)<sub>4</sub>(NCS)<sub>2</sub>].

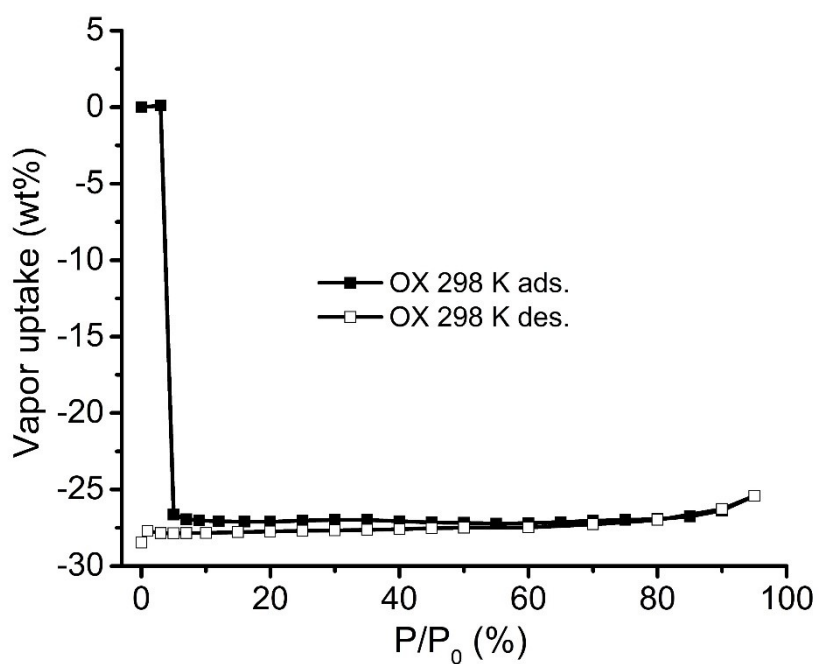

Figure S22. OX vapor sorption isotherms (298 K) of [Co(4-MePy)<sub>4</sub>(NCS)<sub>2</sub>]-α.

Table S1. Summary of different guest-loaded  $[\text{Ni}(\text{4-MePy})_4(\text{NCS})_2]\cdot\beta$  phases with space group  $I4_1/a$ .

| formula                                                                                 | a     | c     | V      | refcode  | Year | Ref. |
|-----------------------------------------------------------------------------------------|-------|-------|--------|----------|------|------|
| $[\text{Ni}(\text{4-MePy})_4(\text{NCS})_2]\cdot 0.53\text{PX}$                         | 16.79 | 22.40 | 6315.4 | ZZZUXE   | 1963 | 1    |
| $[\text{Ni}(\text{4-MePy})_4(\text{NCS})_2]\cdot 0.94\text{C}_6\text{H}_6$              | 16.67 | 22.74 | 6319.2 | ZZZUXK   |      |      |
| $[\text{Ni}(\text{4-MePy})_4(\text{NCS})_2]\cdot 0.67(\text{C}_2\text{H}_5\text{NO}_2)$ | 16.69 | 22.67 | 6314.9 | ZZZUXO   |      |      |
| $[\text{Ni}(\text{4-MePy})_4(\text{NCS})_2]\cdot 0.53(\text{CH}_4\text{O})$             | 16.72 | 22.73 | 6354.4 | ZZZUXQ   |      |      |
| $[\text{Ni}(\text{4-MePy})_4(\text{NCS})_2]\cdot 0.69\text{p-DCB}$                      | 16.74 | 22.76 | 6376.3 | ZZZUXS   |      |      |
| $[\text{Co}(\text{4-MePy})_4(\text{NCS})_2]\cdot 0.67\text{NB}$                         | 16.73 | 22.97 | 6429.1 | ZZZUXU   |      |      |
| $[\text{Co}(\text{4-MePy})_4(\text{NCS})_2]\cdot 0.67(\text{C}_2\text{H}_5\text{NO}_2)$ | 16.53 | 22.73 | 6210.8 | ZZZUXY   |      |      |
| $[\text{Co}(\text{4-MePy})_4(\text{NCS})_2]\cdot 0.57\text{C}_6\text{H}_6$              | 16.68 | 23.14 | 6438.1 | ZZZUYI   |      |      |
| $[\text{Ni}(\text{4-MePy})_4(\text{NCS})_2]$                                            | 16.74 | 22.66 | 6349.9 | ICMPNI   | 1972 | 2    |
| $[\text{Ni}(\text{4-MePy})_4(\text{NCS})_2]\cdot \text{PX}$                             | 16.81 | 22.41 | 6332.5 | QQQGKA   | 1974 | 3    |
| $[\text{Ni}(\text{4-MePy})_4(\text{NCS})_2]\cdot \text{PX}$                             | 16.98 | 23.62 | 6810.1 | BAPZAT   | 1981 | 4    |
| $[\text{Ni}(\text{4-MePy})_4(\text{NCS})_2]\cdot \text{MX}$                             | 17.28 | 23.87 | 7127.5 | BAPZEX   |      |      |
| $[\text{Ni}(\text{4-MePy})_4(\text{NCS})_2]\cdot 2\text{MeOH}$                          | 16.99 | 22.29 | 6434.2 | BAPZIB   |      |      |
| $[\text{Ni}(\text{4-MePy})_4(\text{NCS})_2]\cdot \text{p-cymene}$                       | 17.11 | 23.84 | 6974.3 | BUIPEB   | 1983 | 5    |
| $[\text{Fe}(\text{4-MePy})_4(\text{NCS})_2]\cdot \text{C}_6\text{H}_6$                  | 17.08 | 23.66 | 6902.3 | VEVKEM   | 1990 | 6    |
| $[\text{Fe}(\text{4-MePy})_4(\text{NCS})_2]\cdot \text{MX}$                             | 17.17 | 24.02 | 7081.3 | VEVKOW   |      |      |
| $[\text{Fe}(\text{4-MePy})_4(\text{NCS})_2]\cdot \text{PX}$                             | 17.12 | 23.93 | 7013.8 | VEVKUC   |      |      |
| $[\text{Ni}(\text{4-MePy})_4(\text{NCS})_2]\cdot 1.5\text{C}_4\text{H}_4\text{O}$       | 16.85 | 22.99 | 6527.4 | RUDWAO   | 1996 | 7    |
| $[\text{Ni}(\text{4-MePy})_4(\text{NCS})_2]\cdot 0.5\text{C}_4\text{H}_8\text{O}$       | 16.70 | 22.71 | 6333.6 | RUDWES   |      |      |
| $[\text{Ni}(\text{4-MePy})_4(\text{NCS})_2]\cdot 0.88\text{C}_6\text{H}_6$              | 16.82 | 23.12 | 6540.9 | RUDWIW   |      |      |
| $[\text{Ni}(\text{4-MePy})_4(\text{NCS})_2]\cdot 1.2\text{CH}_2\text{Cl}_2$             | 17.09 | 22.46 | 6559.9 | RUDWOC   |      |      |
| $[\text{Ni}(\text{4-MePy})_4(\text{NCS})_2]\cdot 0.4\text{CH}_2\text{Cl}_2$             | 16.59 | 22.61 | 6222.9 | RUDWUI   |      |      |
| $[\text{Ni}(\text{4-MePy})_4(\text{NCS})_2]\cdot 0.5\text{C}_3\text{H}_8\text{O}_2$     | 16.74 | 22.46 | 6293.5 | RUDXAP   |      |      |
| $[\text{Ni}(\text{4-MePy})_4(\text{NCS})_2]$                                            | 16.64 | 22.67 | 6274.1 | ICMPNI02 | 2001 | 8    |
| $[\text{Fe}(\text{4-MePy})_4(\text{NCS})_2]\cdot 0.25\text{p-MePy}$                     | 17.03 | 23.38 | 6779.8 | XIHHAX   |      |      |
| $[\text{Co}(\text{4-MePy})_4(\text{NCS})_2]\cdot 0.25\text{p-MePy}$                     | 16.84 | 22.82 | 6470.7 | XIHHEB   |      |      |
| $[\text{Ni}(\text{4-MePy})_4(\text{NCS})_2]$                                            | 16.66 | 22.70 | 6299.4 | ICMPNI04 | 2004 | 9    |
| $[\text{Ni}(\text{4-MePy})_4(\text{NCS})_2]$                                            | 16.60 | 22.61 | 6228.2 | ICMPNI05 |      |      |
| $[\text{Ni}(\text{4-MePy})_4(\text{NCS})_2]\cdot 0.94\text{C}_6\text{H}_6$              | 16.86 | 23.10 | 6563.8 | ZZZUXK01 |      |      |
| $[\text{Ni}(\text{4-MePy})_4(\text{NCS})_2]\cdot x\text{G}$                             | 16.68 | 22.63 | 6297.5 | EMEHUA   |      |      |
|                                                                                         |       |       |        |          | 2010 | 10   |

Table S2. Crystallographic information of the three phases of  $[\text{Ni}(\text{4-MePy})_4(\text{NCS})_2]$ .

|                | Closed $\alpha$ phase                                     | PX-loaded $\beta$ phase                                                                | empty-open $\beta'$ phase                                 |
|----------------|-----------------------------------------------------------|----------------------------------------------------------------------------------------|-----------------------------------------------------------|
| refcode        | ICMPNI03                                                  | BAPZAT                                                                                 | ICMPNI04                                                  |
| Formula        | $\text{Ni}(\text{C}_6\text{H}_7\text{N})_4(\text{NCS})_2$ | $\text{Ni}(\text{C}_6\text{H}_7\text{N})_4(\text{NCS})_2\cdot \text{C}_8\text{H}_{10}$ | $\text{Ni}(\text{C}_6\text{H}_7\text{N})_4(\text{NCS})_2$ |
| Formula weight | 547.4                                                     | 653.4                                                                                  | 547.4                                                     |
| Crystal system | Monoclinic                                                | Tetragonal                                                                             | Tetragonal                                                |

| Space group          | $P2_1/c$ | $I4_1/a$ | $I4_1/a$ |
|----------------------|----------|----------|----------|
| $a/\text{Å}$         | 19.226   | 16.98    | 16.657   |
| $b/\text{Å}$         | 9.749    | 16.98    | 16.657   |
| $c/\text{Å}$         | 16.791   | 23.62    | 22.704   |
| $\beta/^\circ$       | 113.62   | 90       | 90       |
| Volume/ $\text{Å}^3$ | 2883.54  | 6810.13  | 6299.35  |
| Z                    | 4        | 8        | 8        |

## References

1. Belitskus, D.; Jeffrey, G. A.; McMullan, R. K.; Stephenson, N. C., Single Crystal Studies on Some Clathrates of Tetra-(4-methylpyridine)-Nickel(II) and Cobalt Dithiocyanates. *Inorg. Chem.* **1963**, *2* (4), 873-875.
2. Andreetti, G. D.; Bocelli, G.; Sgarabotto, P., Bis (Isothiocyanato)tetrakis(4-methylpyridine) nickel(II)  $C_{26}H_{28}N_6NiS_2$ . *Cryst. Struct. Comm* **1972**, *1*, 51-54.
3. Solacolu, I.; Sandulescu, D.; Dragulescu, C.; *Rev.Roum.Chim.* **1974**, *19*, 415.
4. Lipkowski, J.; Suwińska, K.; Andreetti, G. D.; Stadnicka, K., Clathrate inclusion compounds of bis (isothiocyanato)tetrakis(4-methylpyridine) nickel(II): II. Arrangement of guest molecules in the  $\beta$ -Ni (NCS) $_2$ (4-methylpyridine) $_4$  porous crystals. *J. Mol. Struct.* **1981**, *75* (1), 101-112.
5. Bond, D. R.; Jackson, G. E.; Nassimbeni, L. R., Studies in Werner clathrates: part 1: structures of bis (isothiocyanato) bis (4-methylpyridine) bis-(4-phenylpyridine) nickel (II). methyl cellosolve and bis (isothiocyanato) tetra (4-methylpyridine)-nickel(II). p-cymene. *South African Journal of Chemistry* **1983**, *36* (1), 19-26.
6. Lipkowski, J., Crystal structures of the clathrate inclusion compounds formed by the host bis (isothiocyanato) tetrakis (4-methylpyridine) iron (II) with benzene, m-xylene and p-xylene as guests. *J. Incl. Phenom. Mol. Recognit. Chem.* **1990**, *8* (4), 439-448.
7. Manakov, A. Y.; Lipkowski, J.; Suwinska, K.; Kitamura, M., New crystal structures of  $\beta$ -[Ni(NCS) $_2$ (4-methylpyridine) $_4$ ] clathrates with furan, tetrahydrofuran, methylene chloride, benzene + ethanol and methylcellosolve as guest molecules. *J. Incl. Phenom. Mol. Recognit. Chem.* **1996**, *26* (1), 1-20.
8. Harris, J. D.; Eckles, W. E.; Hepp, A. F.; Duraj, S. A.; Fanwick, P. E.; Richardson, J.; Gordon, E. M., Room temperature dissolution of metal powders by thiourea: a novel route to transition metal isothiocyanate complexes. *Mater. Design* **2001**, *22* (7), 625-634.
9. Soldatov, D. V.; Enright, G. D.; Ripmeester, J. A., Polymorphism and Pseudopolymorphism of the [Ni(4-Methylpyridine) $_4$ (NCS) $_2$ ] Werner Complex, the Compound that Led to the Concept of "Organic Zeolites". *Cryst. Growth Des.* **2004**, *4* (6), 1185-1194.
10. Małecki, J. G.; Świtlicka, A.; Groń, T.; Bałanda, M., Correlation between crystal symmetry and the splitting of d orbital in the thiocyanate nickel(II) complexes. *Polyhedron* **2010**, *29* (17), 3198-3206.
